# Supplementary material
Source: PubMed Central journal article supplement (PMC3049519)
Supplement: jcbfm2010141x1.pdf [file jcbfm2010141x1.pdf]

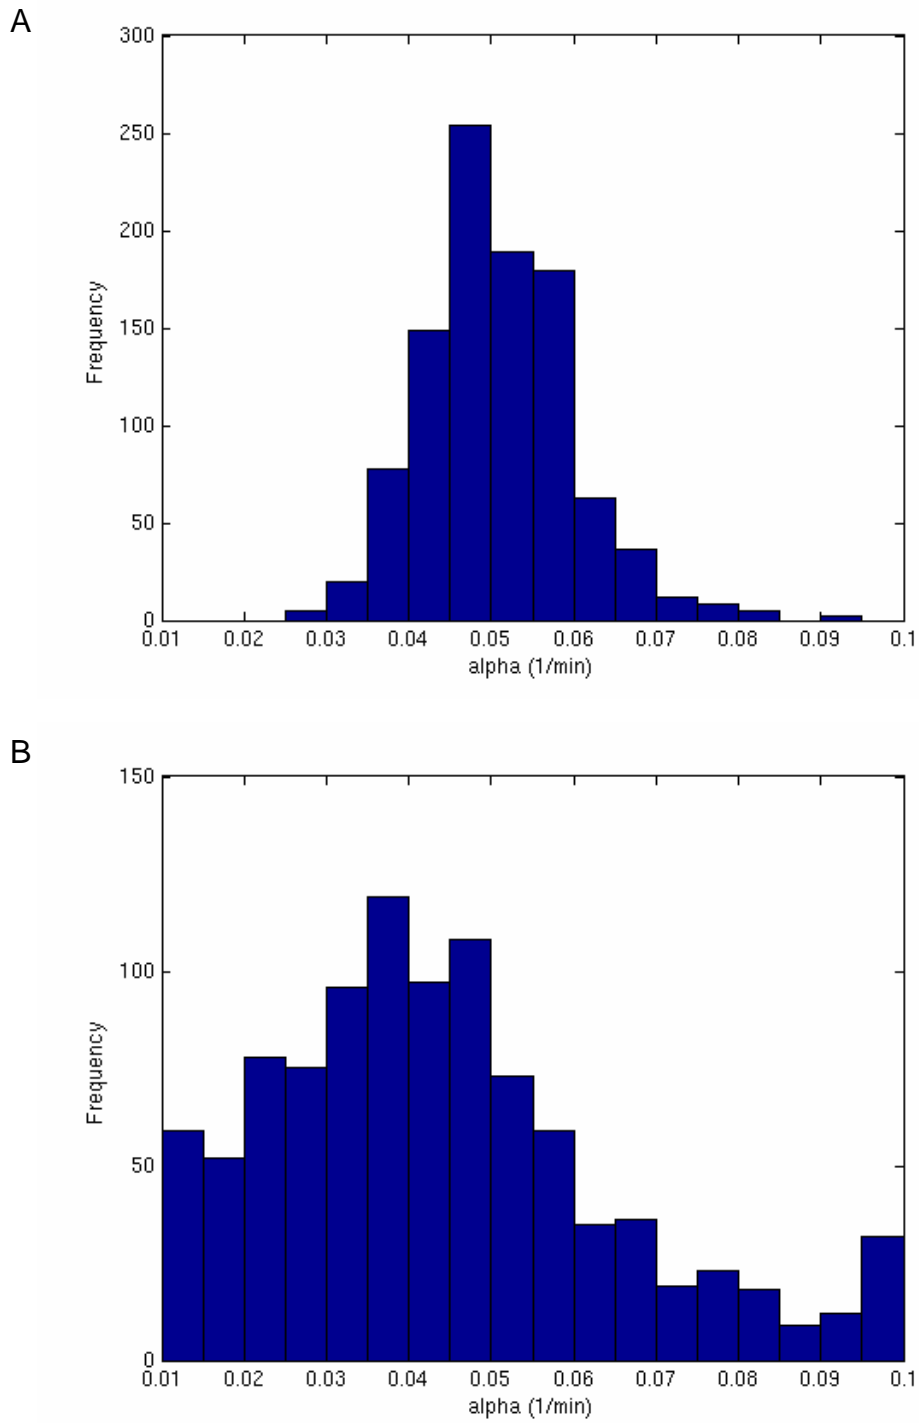

Supplementary Figure 1. Histograms of the basis function exponent (alpha) for simulated normoxic (A) and hypoxic (B) data. The spectra are for the 1000 simulations conducted for each tissue type at noise level 11.
